# Supplementary material
Source: PubMed Central journal article supplement (PMC3831036)
Supplement: mt2013167x1.pdf [file mt2013167x1.pdf]

| Gene           | Forward 5'-3'                                    | Reverse 5'-3'             | Probe 5'-Fam Tamra-3'        |
|----------------|--------------------------------------------------|---------------------------|------------------------------|
| IFN $\gamma$   | AACAGTAAAGCAAAAAGGATGCATT                        | TTCATTGACAGCTTTGTGCTGG    | CGCCAAGTTCGAGGTGAACAACCC     |
| IL-2R          | CACATGCTGTGTACCAGGAGAACCT                        | CCACGAAGTGGTAGATTCTCTTGG  | CAGGTCACTGCAGGGAGCCCC        |
| IL-6           | TCAACTCCATCTGCCCTTCAG                            | AAGGCAACTGGCTGGAAGTCT     | AACAGCTATGAAGTTTCTCTCCGCA    |
| $\beta$ -Actin | GTACAACCTCCTTGCACTCCT                            | TTGTGCAGCAGCAGCGC         | CGCCACCAGTTCGCCATGGAT        |
| CCR2           | CACTTAGACCAGGCCATGCA                             | ACTTCTCACCAACAAAGGCATAAAT | TGACAGAGACTTGAATGACACACTGCTG |
| CXCL9          | TTGCCCAAGCCCTAACTG                               | ACCCTTGCTGAATCTGGGTCTAC   | CATCGCTACACTGAAGAACGGAGATCA  |
| CXCL10         | GAAGACCCTCTGGATACAGCTGC                          | TGCTCCACTGCCTTGCTTTT      | CGCTGTCATCGATTCTCCCTGTGA     |
| TLR2           | AGAACTAAGAGATACTAACTTG                           | ACAGTTCAGGAGTTCATTAAA     | TTTCTGAAGTGTCTGTAGACGAAAT    |
| TLR4           | CCTGAAGATCTTAAGAAGCTAT                           | CCTTGTCTTCAATTGTCTCAAT    | TTCACCAATTTCTCACAACTTCAGT    |
| TLR7           | TCAGCCACAACCAGCTGACAA                            | AATTGCAAAGCATCTTCTAGAAA   | CCTGCGAGATTGGCCAACTGTT       |
| TLR9           | CTGGACCTGTCTATAAGAA                              | ACAGATTGGCCAGAAACTGA      | ACCTGTACCATTGAAATCGTTCA      |
| PD-L1          | TGGAGTATGGCAGCAATGTC                             | CCTCCACAACTGAATAACT       | ATGCAGATTCCAGTAGAACAGA       |
| IDO            | CAGGTTACAGCGCCTGGCAC                             | TCGCAGTAGGGAACAGCAAT      | ACATCACCATGGCGTATGTGTGGAA    |
| eNOS           | CTGTGCATGGATGAATACGAT                            | TGCTGCAAAGCTCTCTCCAT      | ATCCCTAGAGCATGAGGAATTG       |
| iNOS           | TTCCCATCGCTCCGCTG                                | CCGGAGCTGTAGCAGCA         | AACACAGTAATGGCCGACCTGATGTTGC |
| FoxP3          | NP_001101720.1 (Life Technologies, Carlsbad, CA) |                           |                              |

**Table S1. RT PCR primer design.**

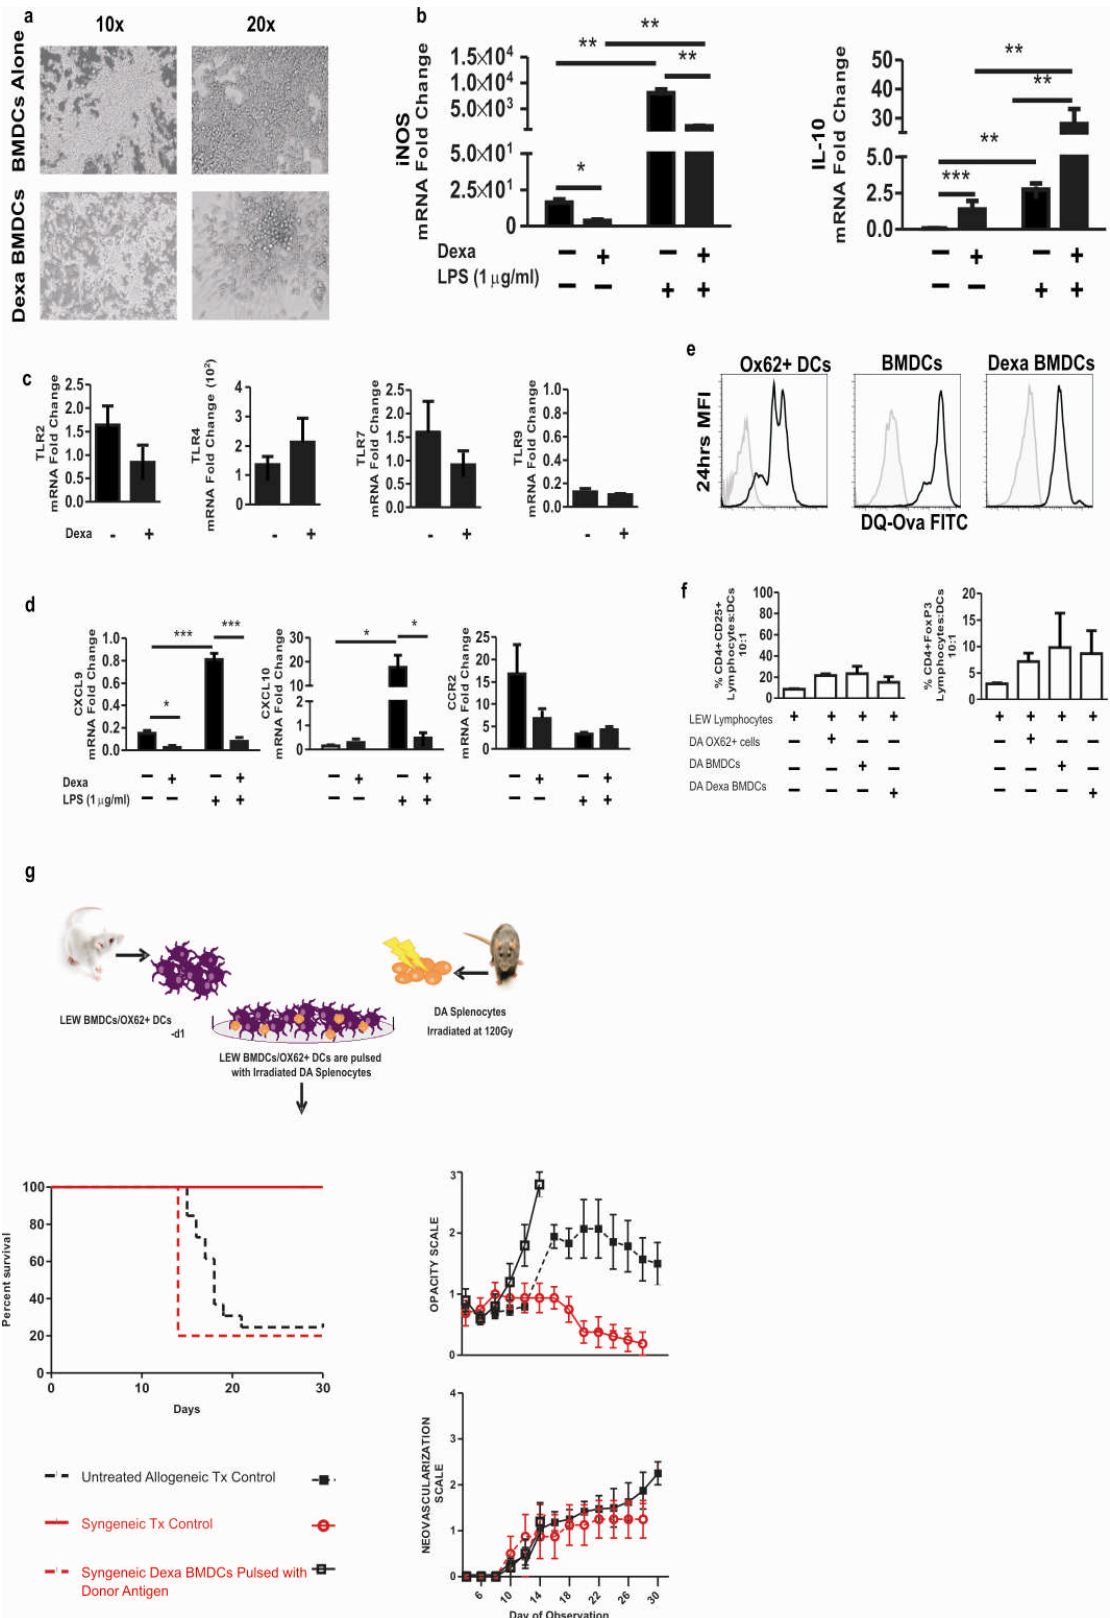

### Figure S1.

(a) Representative bright field microscopy images of BMDCs and Dexa BMDCs. (b) BMDCs and Dexa BMDC cultures mRNA expression (normalised to  $\beta$ -actin and fold change relative to Ox62+ DCs) of immunomodulatory molecules iNOS and IL-10 were analysed. (c) As were expression levels of TLR2, 4, 7 and 9 for BMDCs and Dexa BMDC on day 10 and (d) chemokines CXCL9, CXCL10 and the chemokine receptor CCR2 (mean  $\pm$  SEM \* $p \leq 0.05$ , \*\* $p \leq 0.01$  and \*\*\* $p \leq 0.001$  two-tailed Student's t test  $n=3$ ). (e) Time point analysis (MFI 24hr time point illustrated) of BMDC and Dexa BMDC antigen uptake and processing was analysed using DQ OVA assay (50 $\mu$ g/ml, Ox62+ DCs were used as a control cell population). (f) LEW lymphocyte stimulation with DA Ox62+ DCs, BMDCs or Dexa BMDC percentage population of activated CD4+CD25+ cells and regulatory CD4+FoxP3+ve cells within these co-cultures (mean  $\pm$  SEM,  $n=4$  two-tailed Student's t test) combined analysis of two independent experiments. (g) Illustration of experimental design to pulse LEW BMDCs with DA donor derived alloantigen and graft survival curves of untreated allogeneic control ( $n=26$ ), syngeneic control ( $n= 8$ ) and syngeneic Dexa BMDCs pulsed with donor antigen ( $n=5$ , Kaplan-Meier survival analysis and Mantel-Cox log rank test used for comparisons between curves). Opacity scores and neovascularization day 4-day 30 for control groups and syngenic Dexa BMDCs pulsed with donor antigen.

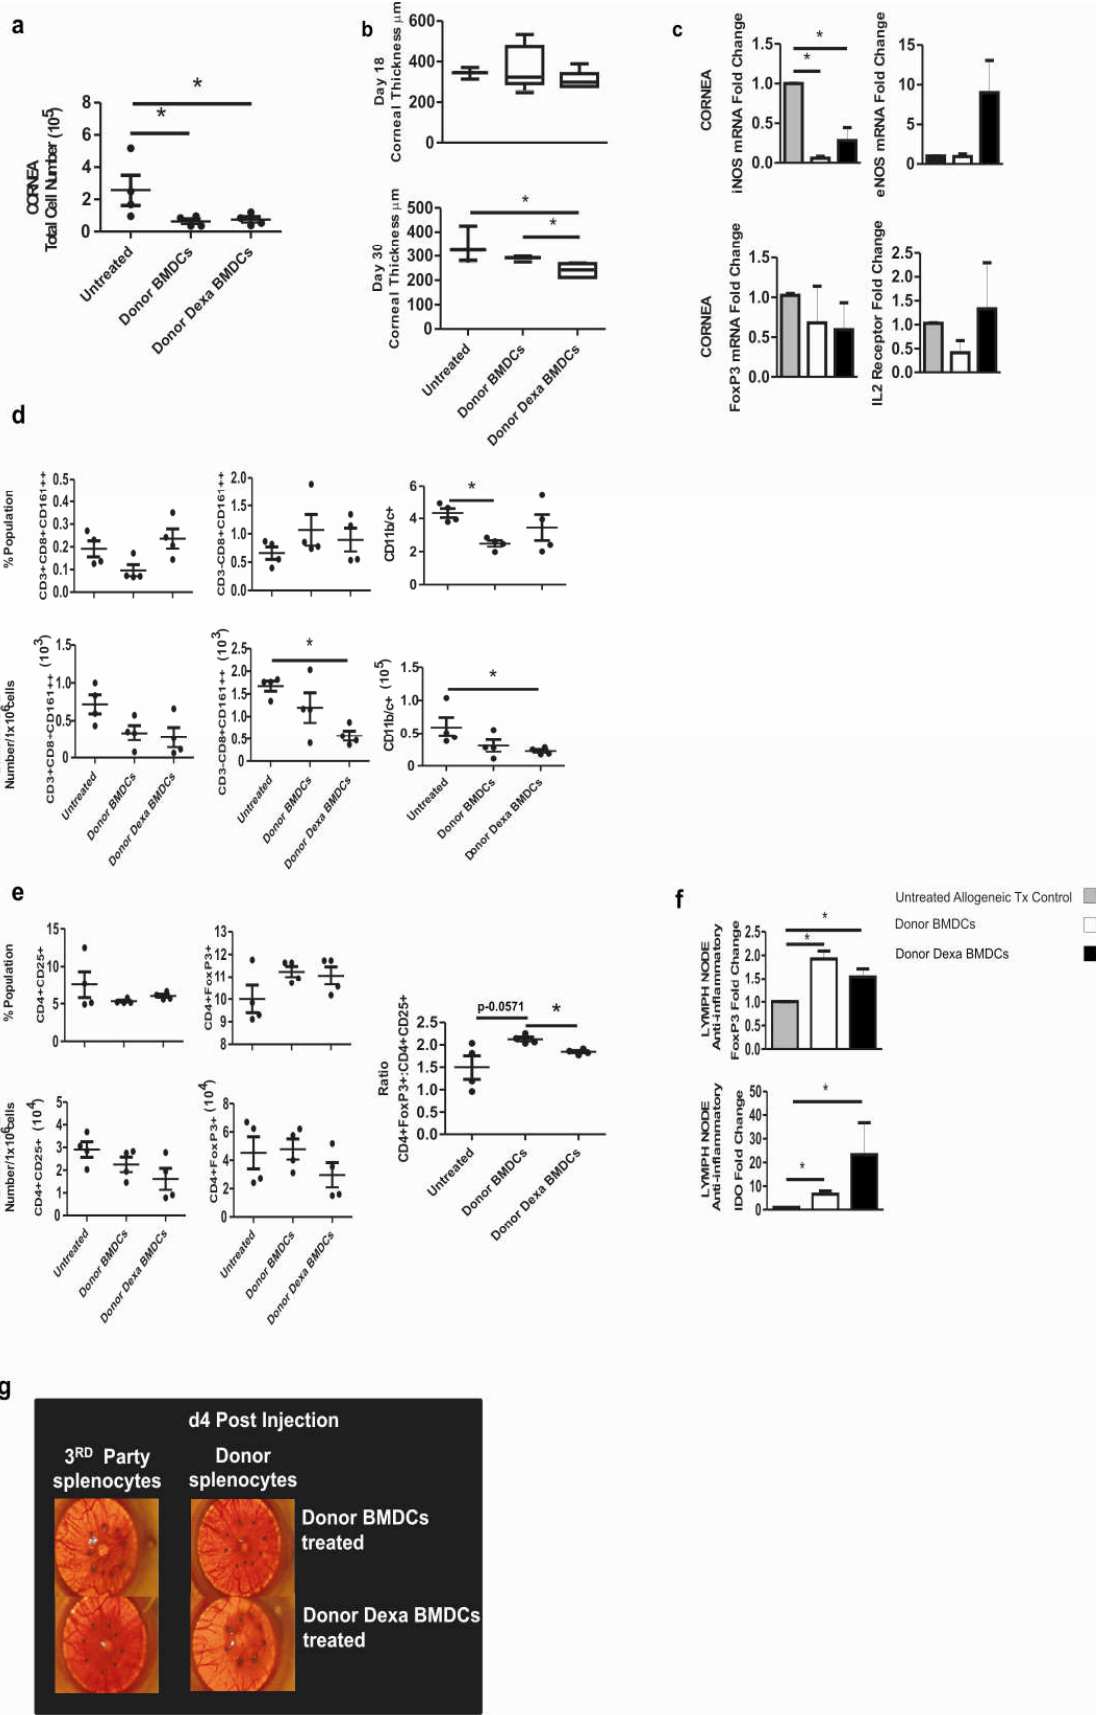

**Figure S2.**

(a) Total cell number in corneal allograft (mean  $\pm$  SEM \* $p \leq 0.05$  two-tailed Mann-Whitney test  $n=4$  per group). (b) Corneal thickness was also evaluated for all groups at both time points (mean  $\pm$  SEM \* $p \leq 0.05$  two-tailed Mann-Whitney test  $n=2-5$  per group). (c) mRNA analysis of intragraft cytokine expression (normalised to  $\beta$ -actin, fold change relative to untreated allogeneic Tx controls) of iNOS, eNOS, Foxp3 and IL2 receptor (CD25) (mean  $\pm$  SEM \* $p \leq 0.05$  two-tailed Mann-Whitney test  $n=4$  per group). (d) Analysis of the same cell populations for draining LNs as described for corneal allograft, percentage cell population, cell numbers/ $1 \times 10^6$  cells and (e) ratio of lymph node regulatory CD4+FoxP3+ cells. (f) Analysis of mRNA expression (normalised to  $\beta$ -actin, fold change relative to untreated allogeneic Tx controls) of immunomodulatory molecules and anti-inflammatory molecules within the draining LNs (mean  $\pm$  SEM \* $p \leq 0.05$  two-tailed Mann-Whitney test  $n=4$  per group). (g) Clinical evaluation of corneal allograft opacity in long-term allograft graft survivors day 4 post injection of donor derived splenocytes ( $n=3-4$  per group).
